# Supplementary material
Source: PubMed Central journal article supplement (PMC3620523)
Supplement: supp_1200310_12-00310_S1_Tab1.pdf [file supp_1200310_12-00310_S1_Tab1.pdf]

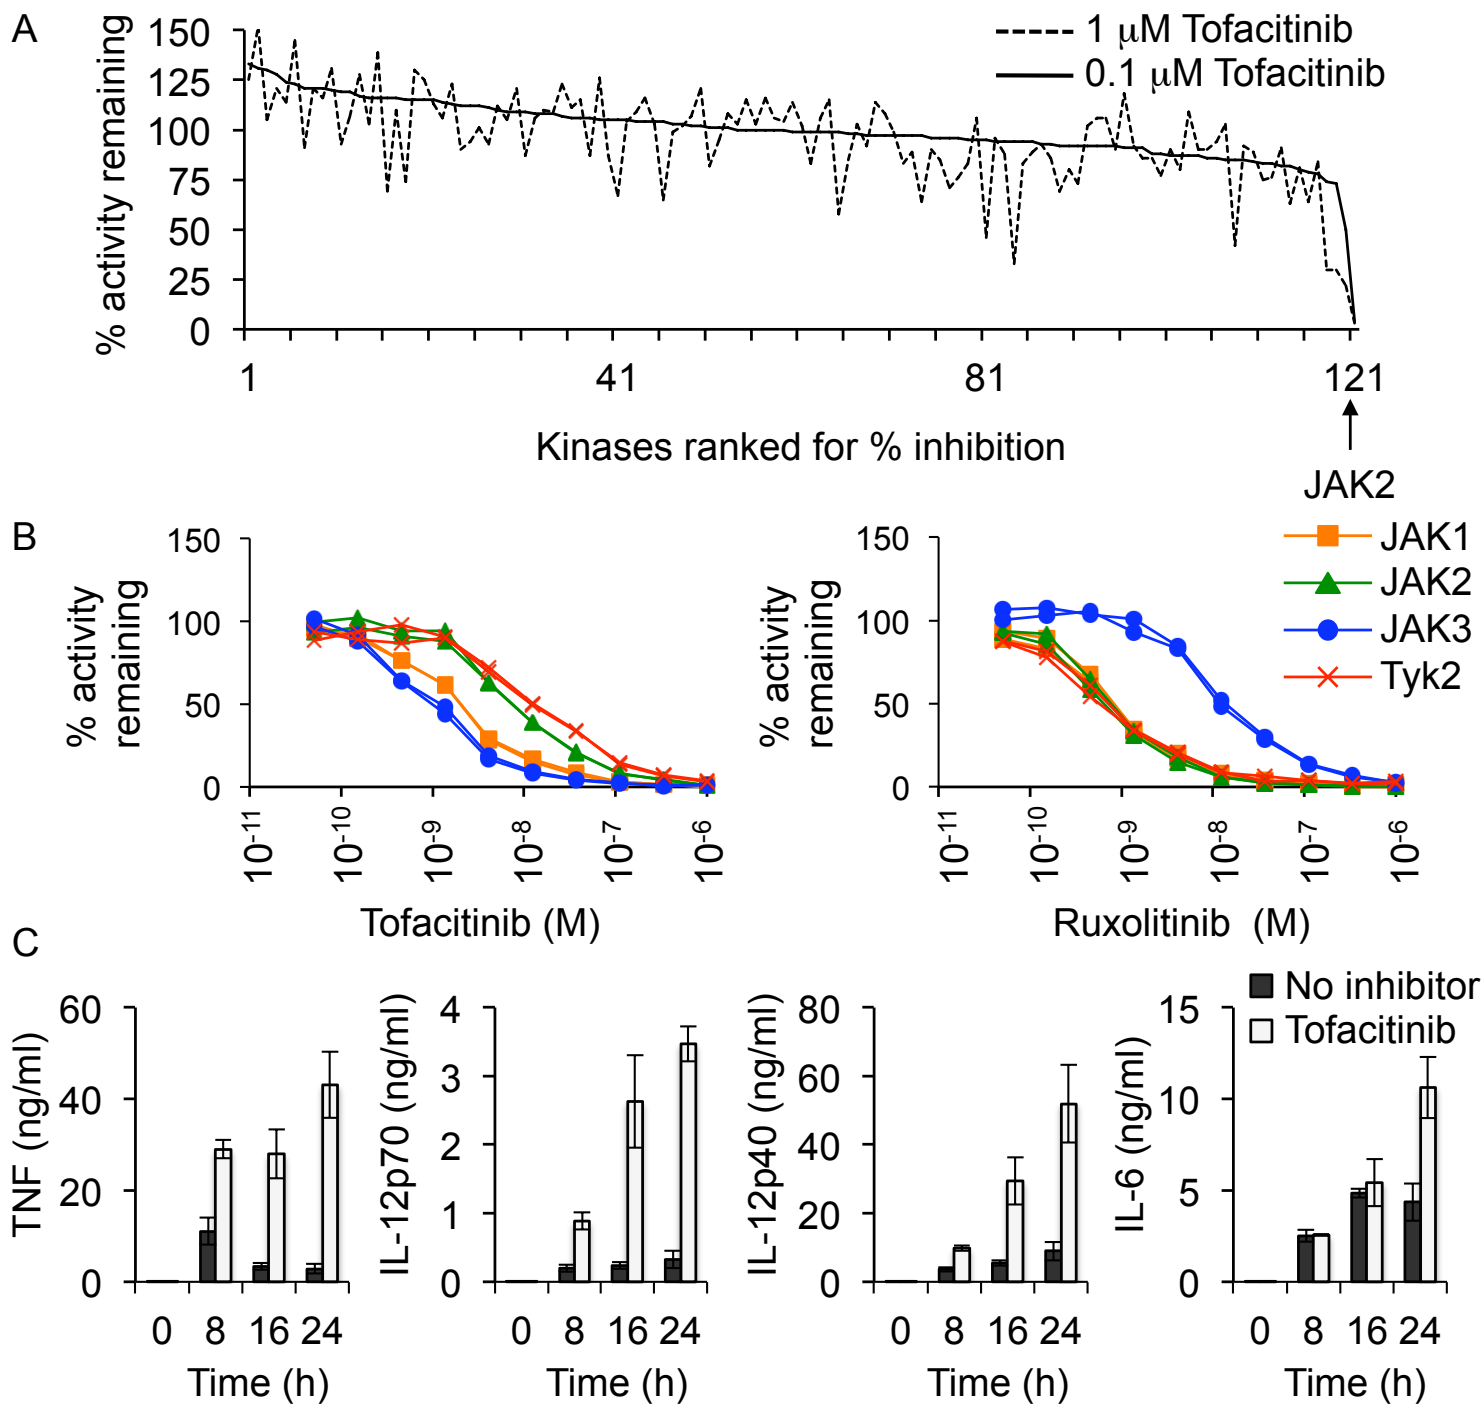

**Supplementary figure 1. Tofacitinib acts as a selective JAK inhibitor and increased the production of TNF and IL-12 in LPS stimulated macrophages.**

- A) Tofacitinib was screened at 0.1 or 1  $\mu$ M against a panel of 121 kinases *in vitro* as described in the methods. For the graph in (A) kinases were then ranked in order of the percentage activity remaining at 0.1  $\mu$ M Tofacitinib.
- B) *In vitro* kinases assays were performed in duplicate with either JAK1, JAK2, JAK3 or Tyk2 with the indicated concentrations of either Tofacitinib or Ruxolitinib. Results are show as % kinase activity remaining compared to no inhibitor controls.
- C) Wild type BMDMs were pre-treated with 5  $\mu$ M Tofacitinib where indicated and then stimulated with 100 ng/ml LPS for the indicated times. Levels of TNF $\alpha$ , IL-12p70, IL-12p40 and IL-6 secreted into the media were determined by Luminex based multiplex assay. Error bars represent the standard deviation form 4 independent cultures.

Supplementary Table 1 Kinase selectivity screens for Ruxolitinib, Tofacitinib and AG-490

The percentage *in vitro* kinase activity remaining relative to no inhibitor controls was determined using *in vitro* kinase assays as described in the methods. Data represents the average and range of duplicate measurements for each condition.  
n.d. = not determined

| kinase        | 0.1 $\mu$ M Ruxolitinib |       | 1 $\mu$ M Ruxolitinib |       | 0.1 $\mu$ M Tofacitinib |       | 1 $\mu$ M Tofacitinib |       | 10 $\mu$ M AG-490 |       |
|---------------|-------------------------|-------|-----------------------|-------|-------------------------|-------|-----------------------|-------|-------------------|-------|
|               | % activity              | range | % activity            | range | % activity              | range | % activity            | range | % activity        | range |
| ABL           | 100                     | 5     | 101                   | 2     | 103                     | 13    | 116                   | 10    | 87                | 9     |
| AMPK          | 107                     | 6     | 89                    | 10    | 83                      | 1     | 95                    | 5     | 105               | 2     |
| ASK1          | 107                     | 3     | 77                    | 8     | 105                     | 7     | 130                   | 11    | n.d.              |       |
| Aurora A      | 86                      | 18    | 26                    | 0     | 93                      | 8     | 119                   | 16    | 64                | 3     |
| Aurora B      | 112                     | 10    | 95                    | 7     | 69                      | 6     | 92                    | 8     | 64                | 3     |
| BRK           | 101                     | 4     | 84                    | 11    | 80                      | 18    | 92                    | 7     | n.d.              |       |
| BRSK1         | 92                      | 6     | 78                    | 17    | 73                      | 2     | 92                    | 7     | 85                | 5     |
| BRSK2         | 93                      | 3     | 92                    | 3     | 82                      | 5     | 101                   | 3     | 75                | 0     |
| BTK           | 76                      | 12    | 58                    | 2     | 96                      | 6     | 94                    | 11    | 85                | 13    |
| CAMK1         | 91                      | 10    | 58                    | 0     | 93                      | 1     | 111                   | 2     | 106               | 4     |
| CAMKKb        | 100                     | 17    | 104                   | 2     | 139                     | 15    | 116                   | 10    | 109               | 7     |
| CDK2-Cyclin A | 96                      | 11    | 57                    | 6     | 69                      | 4     | 116                   | 37    | 111               | 11    |
| CHK1          | 99                      | 0     | 106                   | 7     | 86                      | 13    | 88                    | 1     | 119               | 15    |
| CHK2          | 97                      | 10    | 65                    | 14    | 106                     | 7     | 95                    | 9     | 52                | 6     |
| CK1           | 94                      | 11    | 74                    | 6     | 105                     | 4     | 109                   | 9     | 88                | 5     |
| CK2           | 90                      | 25    | 77                    | 6     | 92                      | 1     | 97                    | 7     | 99                | 5     |
| CLK2          | 73                      | 2     | 21                    | 2     | 106                     | 10    | 108                   | 1     | 102               | 5     |
| CSK           | 91                      | 23    | 63                    | 6     | 84                      | 7     | 78                    | 3     | 95                | 6     |
| DAPK1         | 88                      | 39    | 61                    | 64    | 145                     | 5     | 123                   | 11    | 94                | 11    |
| DYRK1A        | 101                     | 3     | 67                    | 1     | 102                     | 1     | 92                    | 7     | 24                | 2     |
| DYRK2         | 95                      | 17    | 86                    | 12    | 99                      | 14    | 103                   | 5     | 50                | 5     |
| DYRK3         | 103                     | 17    | 107                   | 3     | 110                     | 18    | 116                   | 2     | 44                | 5     |
| EF2K          | 82                      | 15    | 83                    | 12    | 103                     | 1     | 100                   | 2     | 91                | 5     |
| EIF2AK3       | 89                      | 2     | 94                    | 2     | 114                     | 8     | 97                    | 9     | n.d.              |       |
| EPH-A2        | 98                      | 29    | 62                    | 1     | 106                     | 6     | 114                   | 19    | 92                | 5     |
| EPH-A4        | 85                      | 4     | 58                    | 5     | 121                     | 2     | 109                   | 3     | 94                | 10    |
| EPH-B1        | 71                      | 2     | 48                    | 4     | 93                      | 4     | 93                    | 4     | 93                | 5     |
| EPH-B2        | 132                     | 38    | 79                    | 7     | 91                      | 10    | 121                   | 12    | 87                | 7     |
| EPH-B3        | 96                      | 9     | 86                    | 9     | 103                     | 8     | 85                    | 5     | 117               | 15    |
| EPH-B4        | 78                      | 9     | 59                    | 0     | 131                     | 46    | 120                   | 4     | 97                | 6     |
| ERK1          | 101                     | 16    | 92                    | 17    | 108                     | 5     | 97                    | 4     | 83                | 13    |
| ERK2          | 115                     | 15    | 102                   | 3     | 99                      | 17    | 97                    | 10    | 105               | 9     |
| ERK8          | 86                      | 29    | 47                    | 4     | 121                     | 1     | 121                   | 6     | 83                | 5     |
| FGF-R1        | 79                      | 9     | 34                    | 4     | 42                      | 4     | 85                    | 3     | 93                | 4     |
| GCK           | 86                      | 9     | 44                    | 2     | 87                      | 0     | 109                   | 7     | 102               | 7     |
| GSK3b         | 100                     | 8     | 62                    | 4     | 110                     | 2     | 108                   | 9     | 78                | 3     |
| HER4          | 106                     | 6     | 90                    | 5     | 116                     | 8     | 121                   | 19    | 62                | 11    |
| HIPK1         | 102                     | 4     | 95                    | 6     | 90                      | 4     | 112                   | 4     | 85                | 1     |
| HIPK2         | 94                      | 3     | 69                    | 2     | 128                     | 21    | 117                   | 6     | 83                | 0     |
| HIPK3         | 116                     | 3     | 114                   | 7     | 109                     | 14    | 108                   | 3     | 103               | 1     |
| IGF-1R        | 94                      | 11    | 100                   | 5     | 109                     | 9     | 104                   | 11    | 119               | 5     |
| IKKb          | 101                     | 18    | 76                    | 15    | 126                     | 3     | 105                   | 2     | 89                | 3     |
| IKKe          | 105                     | 33    | 46                    | 5     | 90                      | 7     | 87                    | 8     | 88                | 0     |
| IR            | 95                      | 9     | 89                    | 1     | 87                      | 8     | 105                   | 9     | 115               | 6     |
| IRAK1         | 63                      | 12    | 19                    | 4     | 111                     | 4     | 106                   | 3     | n.d.              |       |
| IRAK4         | 89                      | 27    | 97                    | 7     | 80                      | 1     | 87                    | 0     | 103               | 1     |

|                   |     |    |     |    |     |    |     |    |      |    |
|-------------------|-----|----|-----|----|-----|----|-----|----|------|----|
| IRR               | 97  | 22 | 65  | 22 | 102 | 3  | 103 | 5  | 58   | 1  |
| JAK2              | 3   | 1  | 2   | 1  | 3   | 1  | 4   | 0  | 98   | 4  |
| JNK1              | 84  | 26 | 79  | 15 | 81  | 5  | 80  | 3  | 88   | 5  |
| JNK2              | 105 | 37 | 89  | 13 | 88  | 9  | 94  | 4  | 99   | 6  |
| JNK3              | 101 | 27 | 94  | 1  | 107 | 10 | 119 | 12 | 91   | 7  |
| Lck               | 95  | 1  | 69  | 8  | 30  | 0  | 73  | 9  | 97   | 2  |
| LKB1              | 106 | 36 | 87  | 13 | 95  | 5  | 101 | 9  | 94   | 11 |
| MAPKAP-K2         | 102 | 13 | 102 | 9  | 91  | 11 | 82  | 7  | 112  | 10 |
| MAPKAP-K3         | 89  | 1  | 101 | 2  | 118 | 7  | 91  | 4  | 122  | 6  |
| MARK1             | 96  | 7  | 55  | 3  | 63  | 1  | 82  | 10 | 95   | 5  |
| MARK2             | 97  | 6  | 42  | 7  | 85  | 4  | 98  | 1  | 77   | 3  |
| MARK3             | 56  | 22 | 13  | 6  | 33  | 4  | 94  | 16 | 70   | 12 |
| MARK4             | 94  | 20 | 88  | 1  | 86  | 1  | 93  | 2  | 98   | 9  |
| MEKK1             | 89  | 31 | 89  | 6  | 83  | 80 | 97  | 7  | 99   | 6  |
| MELK              | 81  | 11 | 42  | 7  | 74  | 5  | 115 | 12 | 79   | 4  |
| MINK1             | 122 | 27 | 94  | 5  | 90  | 9  | 96  | 7  | 93   | 6  |
| MKK1              | 108 | 10 | 73  | 6  | 67  | 6  | 105 | 6  | 82   | 9  |
| MKK2              | 99  | 4  | 93  | 4  | 112 | 20 | 110 | 3  | 109  | 2  |
| MKK6              | 95  | 5  | 101 | 8  | 89  | 2  | 97  | 8  | 93   | 12 |
| MLK1              | 82  | 13 | 34  | 2  | 90  | 8  | 86  | 5  | 52   | 5  |
| MLK3              | 65  | 20 | 27  | 5  | 75  | 1  | 83  | 12 | 65   | 6  |
| MNK1              | 81  | 9  | 66  | 5  | 115 | 0  | 100 | 11 | 98   | 2  |
| MNK2              | 88  | 11 | 39  | 1  | 64  | 10 | 97  | 2  | 102  | 3  |
| MPSK1             | 104 | 4  | 101 | 5  | 83  | 14 | 94  | 10 | n.d. |    |
| MSK1              | 84  | 0  | 29  | 1  | 76  | 15 | 83  | 10 | 28   | 5  |
| MST2              | 97  | 28 | 68  | 8  | 64  | 12 | 79  | 7  | 101  | 2  |
| MST4              | 140 | 31 | 105 | 24 | 109 | 0  | 87  | 8  | 86   | 0  |
| NEK2a             | 108 | 22 | 82  | 1  | 107 | 32 | 102 | 16 | 65   | 2  |
| NEK6              | 84  | 10 | 83  | 22 | 90  | 5  | 87  | 3  | 95   | 13 |
| NUAK1             | 89  | 24 | 26  | 1  | 30  | 2  | 74  | 5  | 58   | 4  |
| OSR1              | 80  | 30 | 40  | 3  | 94  | 12 | 112 | 9  | n.d. |    |
| p38 $\alpha$ MAPK | 85  | 15 | 83  | 1  | 103 | 4  | 100 | 1  | 82   | 3  |
| p38 $\beta$ MAPK  | 97  | 16 | 79  | 18 | 115 | 3  | 106 | 12 | 95   | 0  |
| p38 $\delta$ MAPK | 67  | 22 | 66  | 3  | 108 | 17 | 101 | 7  | 99   | 3  |
| p38 $\gamma$ MAPK | 94  | 15 | 86  | 5  | 130 | 9  | 115 | 6  | 129  | 1  |
| PAK2              | 88  | 24 | 84  | 9  | 114 | 2  | 99  | 2  | 88   | 11 |
| PAK4              | 96  | 3  | 57  | 0  | 116 | 16 | 104 | 10 | 89   | 10 |
| PAK5              | 94  | 15 | 72  | 4  | 94  | 4  | 86  | 7  | 99   | 5  |
| PAK6              | 96  | 10 | 70  | 1  | 116 | 10 | 100 | 3  | 106  | 4  |
| PDK1              | 101 | 37 | 66  | 8  | 123 | 3  | 107 | 14 | 103  | 6  |
| PHK               | 60  | 3  | 15  | 0  | 85  | 11 | 96  | 2  | 98   | 11 |
| PIM1              | 101 | 16 | 85  | 3  | 101 | 8  | 112 | 5  | 53   | 0  |
| PIM2              | 87  | 5  | 90  | 12 | 121 | 21 | 102 | 5  | 93   | 10 |
| PIM3              | 90  | 13 | 85  | 10 | 114 | 9  | 124 | 12 | 25   | 1  |
| PKA               | 95  | 11 | 53  | 2  | 89  | 1  | 94  | 4  | 98   | 11 |
| PKBa              | 93  | 24 | 77  | 15 | 125 | 4  | 115 | 1  | 117  | 4  |
| PKBb              | 86  | 15 | 87  | 4  | 92  | 6  | 85  | 9  | 52   | 7  |
| PKCa              | 88  | 14 | 67  | 5  | 71  | 0  | 96  | 0  | 107  | 7  |
| PKCz              | 100 | 21 | 95  | 1  | 106 | 20 | 100 | 21 | 105  | 5  |
| PKCy              | 93  | 8  | 80  | 2  | 102 | 5  | 99  | 11 | n.d. |    |
| PKD1              | 101 | 6  | 67  | 16 | 106 | 27 | 92  | 4  | 92   | 3  |
| PLK1              | 108 | 1  | 95  | 6  | 121 | 18 | 128 | 7  | 119  | 4  |
| PRAK              | 83  | 16 | 84  | 3  | 123 | 7  | 113 | 10 | 77   | 4  |

|        |     |    |    |    |     |    |     |    |      |    |
|--------|-----|----|----|----|-----|----|-----|----|------|----|
| PRK2   | 84  | 5  | 61 | 7  | 22  | 0  | 50  | 2  | 91   | 8  |
| RIPK2  | 108 | 17 | 78 | 4  | 92  | 3  | 91  | 9  | 96   | 11 |
| ROCK 2 | 60  | 9  | 59 | 59 | 46  | 9  | 95  | 15 | 78   | 4  |
| RSK1   | 82  | 6  | 68 | 9  | 76  | 23 | 96  | 6  | 85   | 11 |
| RSK2   | 92  | 4  | 81 | 3  | 86  | 2  | 91  | 3  | 109  | 4  |
| S6K1   | 79  | 23 | 53 | 2  | 77  | 16 | 88  | 0  | 96   | 4  |
| SGK1   | 100 | 13 | 75 | 10 | 106 | 19 | 92  | 2  | 18   | 2  |
| SmMLCK | 93  | 22 | 67 | 6  | 104 | 3  | 105 | 3  | 94   | 15 |
| Src    | 67  | 14 | 62 | 4  | 90  | 7  | 92  | 5  | 56   | 1  |
| SRPK1  | 85  | 13 | 67 | 4  | 89  | 8  | 84  | 6  | 92   | 2  |
| STK33  | 108 | 1  | 84 | 7  | 103 | 19 | 98  | 4  | n.d. |    |
| SYK    | 96  | 18 | 83 | 30 | 152 | 16 | 131 | 7  | 86   | 9  |
| TAK1   | 85  | 2  | 60 | 1  | 113 | 34 | 115 | 7  | 116  | 1  |
| TAO1   | 104 | 1  | 85 | 15 | 103 | 4  | 104 | 12 | 125  | 10 |
| TBK1   | 82  | 16 | 46 | 0  | 83  | 19 | 99  | 6  | 107  | 2  |
| TIE2   | 98  | 4  | 78 | 3  | 106 | 19 | 99  | 1  | n.d. |    |
| TLK1   | 82  | 3  | 80 | 8  | 104 | 8  | 100 | 3  | n.d. |    |
| TrkA   | 32  | 1  | 18 | 3  | 87  | 11 | 106 | 13 | 85   | 8  |
| TTK    | 95  | 7  | 44 | 2  | 115 | 7  | 99  | 3  | 76   | 1  |
| VEG-FR | 102 | 32 | 56 | 10 | 58  | 10 | 99  | 5  | 86   | 14 |
| YES1   | 75  | 10 | 59 | 5  | 65  | 4  | 104 | 3  | 72   | 4  |
| ZAP70  | 95  | 7  | 92 | 16 | 125 | 3  | 133 | 0  | n.d. |    |
